# Supplementary material for: Selectivity in guest–host binding in assemblies of bisphenols
Source: Royal Society of Chemistry journal article supplement (doi:10.1039/b512786f), 2005-01-01
Supplement: b512786f.pdf [file b512786f.pdf]

## Supplementary materials

### Selectivity in guest-host binding in assemblies of *bis*-phenols

Rupam J. Sarma and Jubaraj B. Baruah

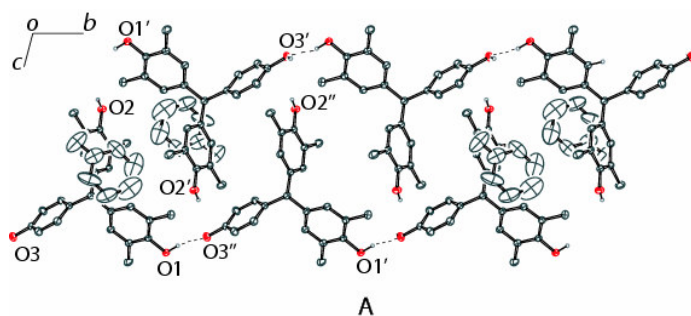

Formation of hydrogen-bonded sheets along [100] plane from *bis*(4-hydroxy-3,5-dimethylphenyl)(4-hydroxyphenyl)methane with toluene

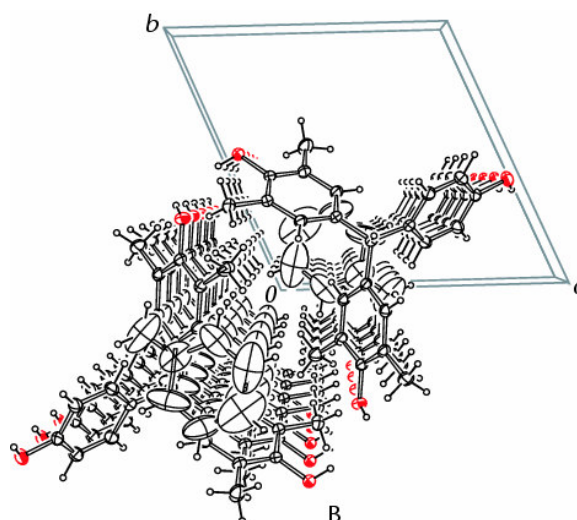

Packing of *bis*(4-hydroxy-3,5-dimethylphenyl)(4-hydroxyphenyl)methane with toluene  
guest viewed parallel to the *a*-axis

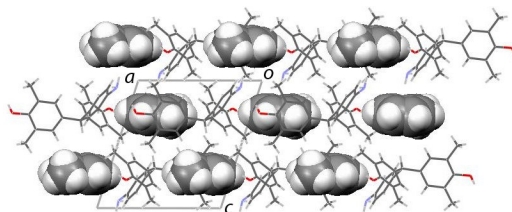

Two-dimensional hydrogen-bonded network in *bis*(4-hydroxy-3,5-dimethylphenyl)(4-aminophenyl)methane with toluene as viewed parallel to [100]

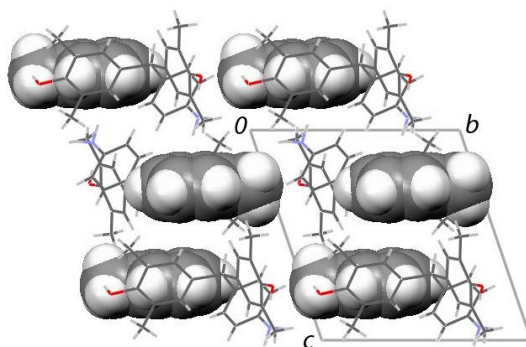

Two-dimensional hydrogen-bonded network in *bis*(4-hydroxy-3,5-dimethylphenyl)(4-aminophenyl)methane with toluene as viewed parallel to [001]

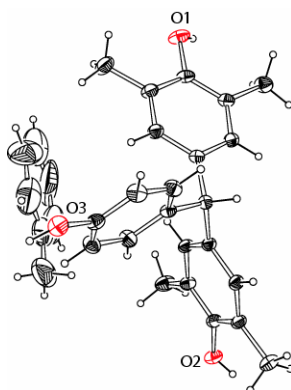

Structure of adduct of *bis* (4-hydroxy-3,5-dimethylphenyl)(4-hydroxyphenyl)methane  
with toluene

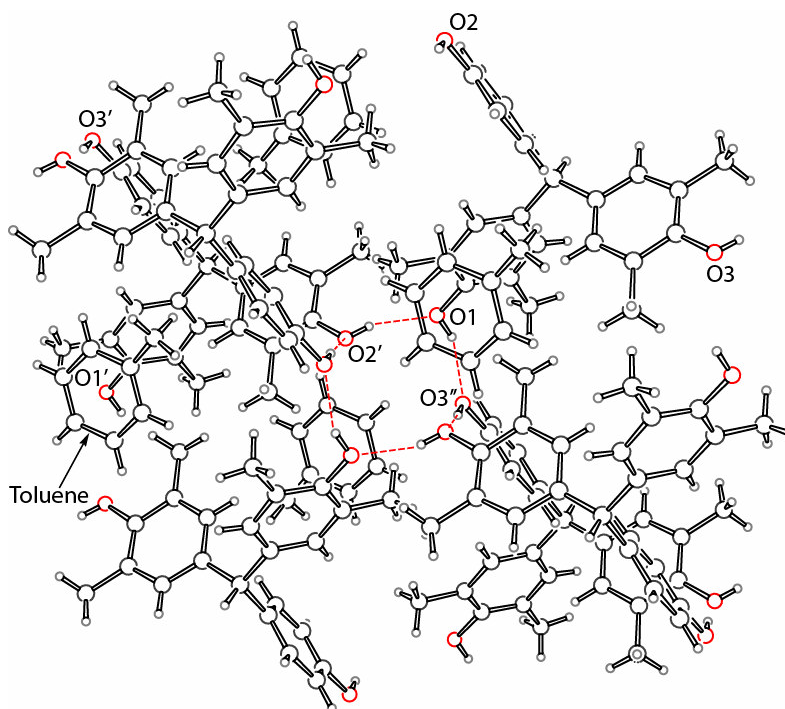

The H-bonding interactions in adduct of *bis*(4-hydroxy-3,5-dimethylphenyl) (4-hydroxyphenyl)methane with toluene showing cyclic hydrogen bonded hexamers generated by intermolecular O–H $\cdots$ O hydrogen-bonding interactions between the hydroxyl groups (thermal ellipsoids drawn to 30% probability)

Table: Important donor acceptor bond distances and angles in adduct of *bis*(4-hydroxy-3,5-dimethylphenyl)(4-hydroxyphenyl)methane with toluene

| D–H $\cdots$ A                           | d (D–H) | d(D $\cdots$ A) | <D–H $\cdots$ A ( $^{\circ}$ ) |
|------------------------------------------|---------|-----------------|--------------------------------|
| O1–H1o $\cdots$ O3<br>[x, y+1, z]        | 0.814   | 2.726           | 150.0                          |
| O3–H2o $\cdots$ O2<br>[–x+1, –y+1, –z+2] | 0.923   | 2.791           | 173.9                          |
| O2–H2o $\cdots$ O1<br>[x, y, z+1]        | 0.776   | 2.791           | 152.1                          |

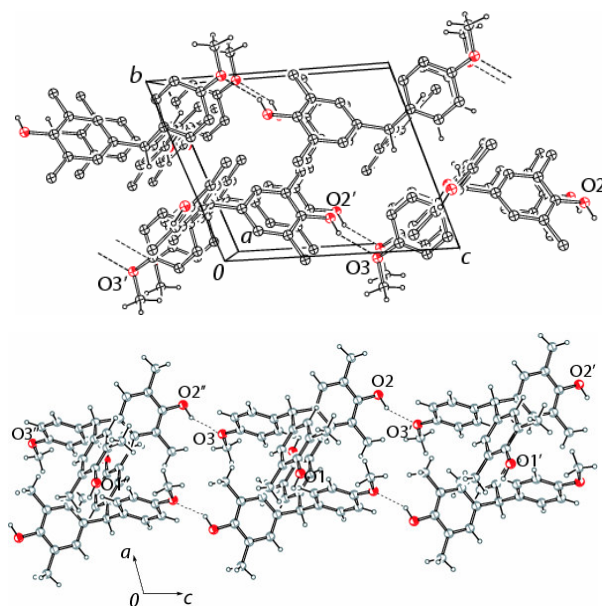

The hydrogen bonding interactions in the crystal structure of *bis*(4-hydroxy-3,5-dimethylphenyl)(4-methoxyphenyl)methane along two crystallographic direction.

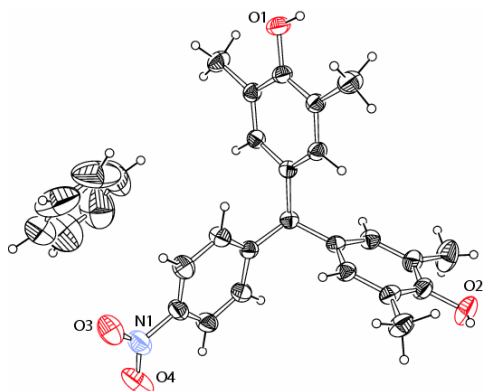

Structure of adduct of bis(4-hydroxy-3,5-dimethylphenyl) (4-nitrophenyl)methane with benzene (**2d**)

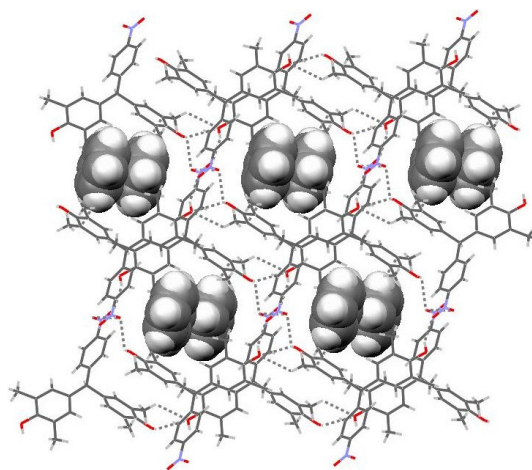

View of the packing of adduct of bis(4-hydroxy-3,5-dimethylphenyl) (4-nitrophenyl)methane with benzene parallel to *b*-axis and the orientation of benzene molecules in the cavities of the lattice



Packing of adduct of *bis*(4-hydroxy-3,5-dimethylphenyl)(4-formylphenyl)-methane (**2e**) with benzene

Table: Donor acceptor distances and angles in *bis*(4-hydroxy-3,5-dimethylphenyl)(4-formylphenyl)-methane **2e**

| D–H $\cdots$ A                               | d(D–H) | d(D $\cdots$ A) | $\angle$ D–H $\cdots$ A( $^\circ$ ) |
|----------------------------------------------|--------|-----------------|-------------------------------------|
| O1–H1o $\cdots$ O3<br>[x–1/2, –y+3/2, z+1/2] | 0.891  | 2.740           | 145.3                               |
| O2–H2o $\cdots$ O1<br>[x+1, y, z]            | 0.862  | 2.994           | 164.1                               |

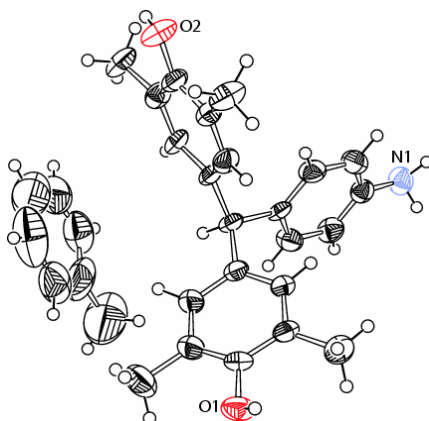

Structure of adduct of *bis*(4-hydroxy-3,5-dimethylphenyl)(4-aminophenyl)methane with toluene (**2f**).

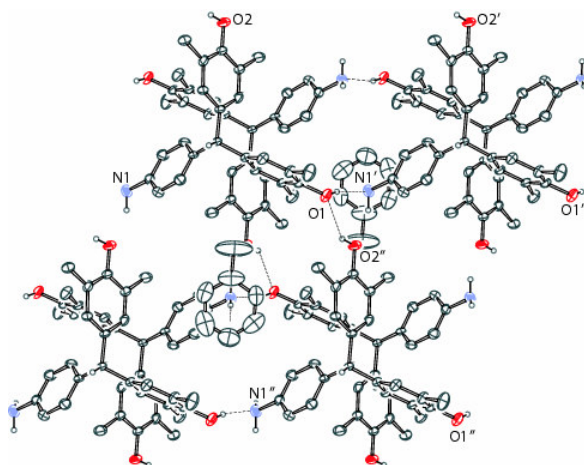

Packing adduct of *bis*(4-hydroxy-3,5-dimethylphenyl)(4-aminophenyl)methane with toluene of the molecules that intermolecular hydrogen bonding between the O–H group of the bis-phenol and N–H group (thermal ellipsoids drawn to 50% probability)

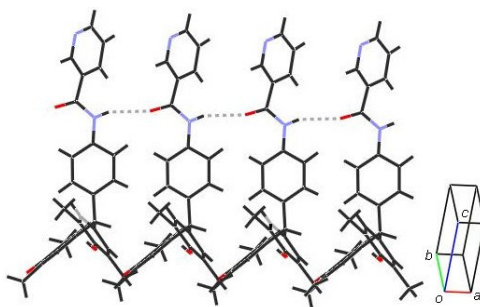

Packing of the *bis*{[(4-hydroxy-3,5-dimethylphenyl)methyl]-phenyl}nicotinamide that intermolecular hydrogen bonding between the –OH group of the phenols and C=O group of nicotinamide group
